# Supplementary material
Source: PubMed Central journal article supplement (PMC3428838)

# Ray-Sinha et al. SUPPLEMENTARY FIGURE 1

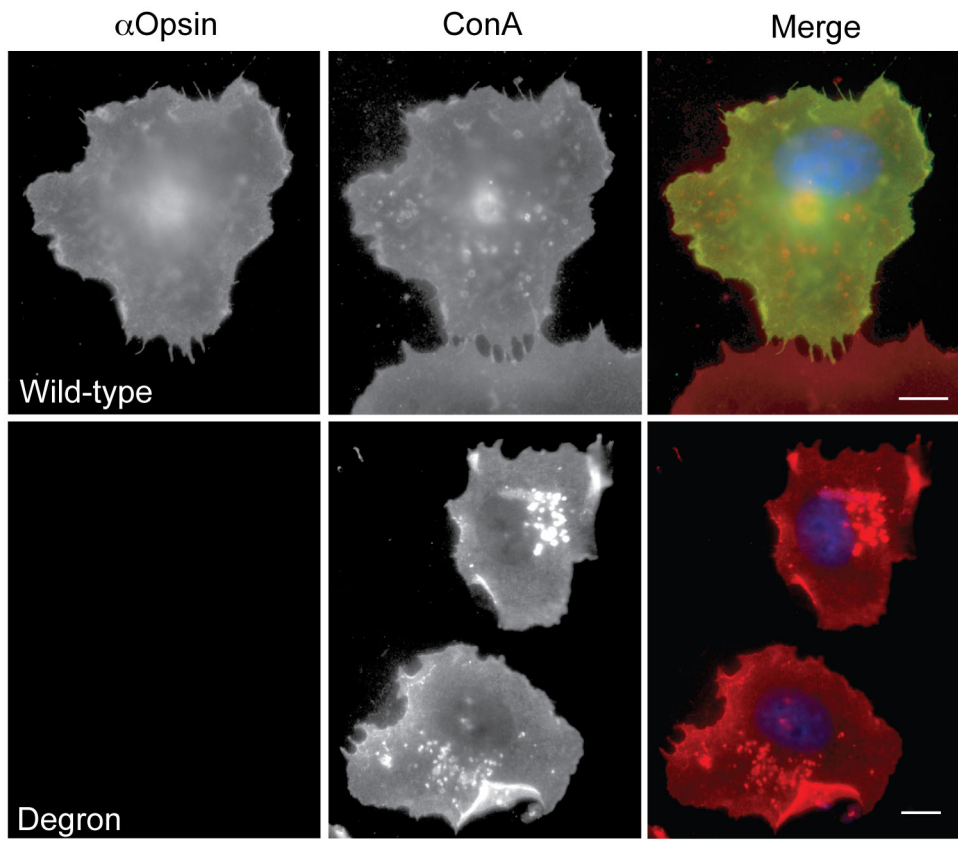

# Ray-Sinha et al. SUPPLEMENTARY FIGURE 2

$\alpha$ Opsin

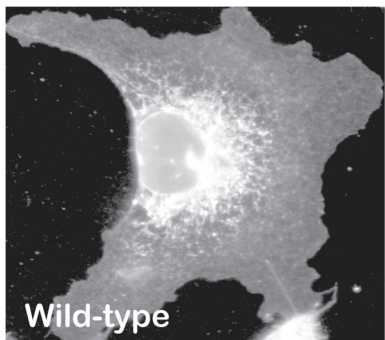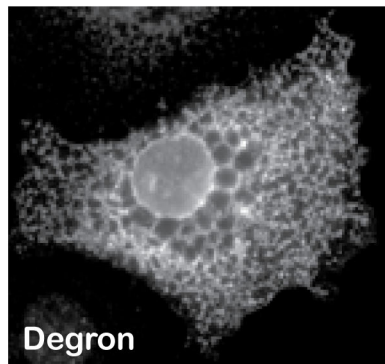

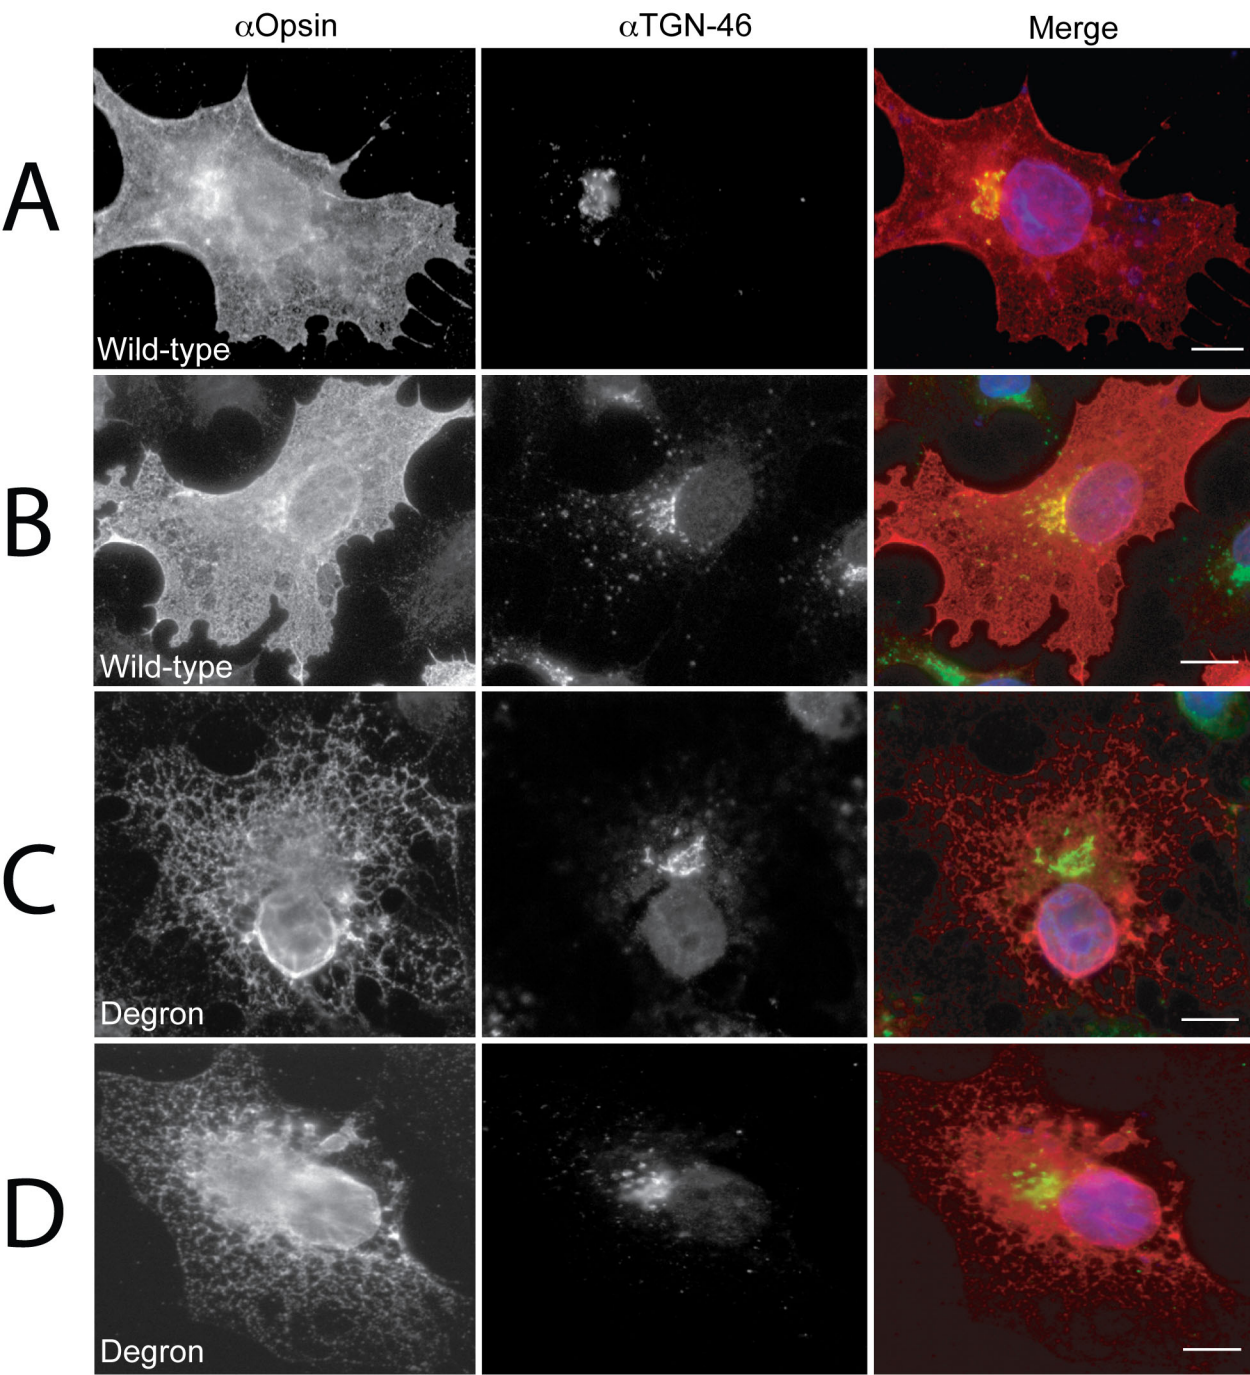

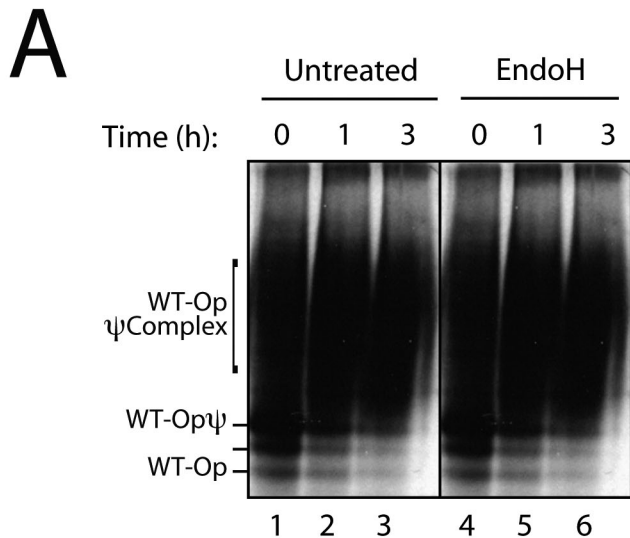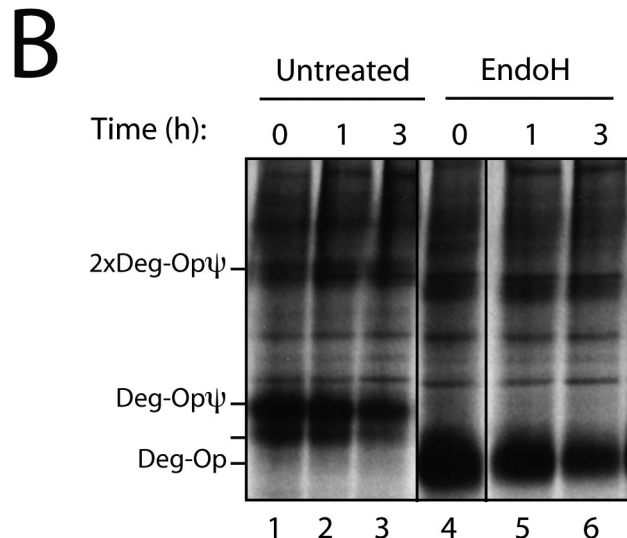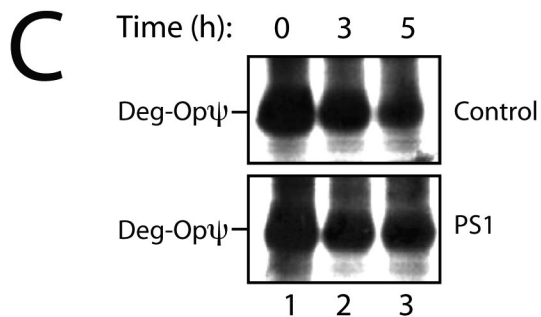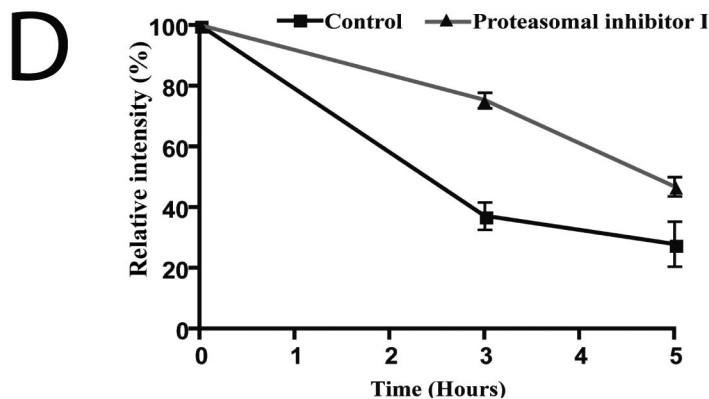

Supplement: NIHMS49305-supplement-Supp_Figs.pdf [file NIHMS49305-supplement-Supp_Figs.pdf]
